# Supplementary material for: Adherence to Mediterranean Diet and Its Association with Maternal and Newborn Outcomes
Source: MDPI journal article supplement (doi:10.3390/ijerph19148497), 2022-07-12
Supplement: s1 [file s1]

# Questionnaire

1. Age

---

2. Nationality

---

3. Educational qualification

☐

Primary School

☐

Secondary school

☐

Degree

☐

Master's or PhD

4. Write your height (cm)

---

5. Write your weight before pregnancy (kg)

---

6. How many kilos did you gain in the last pregnancy?

---

7. On average how many kilos did you gain in previous pregnancies?

---

8. Have you had any other pregnancies?

☐ Yes

☐ No

9. How many spontaneous births?

☐ 0

☐ 1

☐ 2

☐ > 3

10. How many spontaneous miscarriages?

☐ 0

☐ 1

☐ 2

☐ > 3

11. How many IVGs?

☐ 0

☐ 1

☐ 2

☐ > 3

12. Do you suffer from any major diseases?

- ☐ Diabetes
- ☐ Thyroidopathies
- ☐ Hypertension
- ☐ Polycystic ovary
- ☐ Heart diseases
- ☐ Genetic diseases
- ☐ Epilepsy
- ☐ None
- ☐ Other: \_\_\_\_\_

13. Do you usually take any drugs?

- ☐ Yes
- ☐ No

14. If the answer is "yes" write which drugs, otherwise answer "no".

---

---

---

---

---

15. What type of birth did you undergo?

☐ Natural

☐ Cesarean

16. At what week of gestation did you give birth?

---

17. How much did the baby weigh at birth (gr)?

---

18. How long was the baby at birth (cm)?

---

19. Where was the baby admitted after birth?

☐ Nest (cradle near the mother)

☐ Neonatal Intensive Care

☐ Other: 

---

20. If the answer is "Neonatal Intensive Care", write the reason

---

21. Did you develop pathologies during pregnancy?

- ☐ No
- ☐ Gestational diabetes
- ☐ Gestational hypertension
- ☐ Preeclampsia
- ☐ Eclampsia
- ☐ Cholestasis
- ☐ Toxoplasmosis
- ☐ Cytomegalovirus
- ☐ Chickenpox
- ☐ Covid-19
- ☐ Other: \_\_\_\_\_

22. If you answered "Covid 19" to the previous question, specify your gestation period

\_\_\_\_\_

23. Were you often on a diet before pregnancy?

- ☐ Yes
- ☐ No

24. Were you worried about your weight before pregnancy?

- ☐ Yes
- ☐ No

25. Were you on a diet during pregnancy?

- ☐ Yes
- ☐ No

26. If the answer is yes, who was it followed by?

- ☐ Nutritionist
- ☐ Gynecologist
- ☐ Family Doctor
- ☐ Other: \_\_\_\_\_

27. Were you worried about your weight during pregnancy?

- ☐ Yes
- ☐ No

28. Did you attend a birth accompaniment course during your last pregnancy?

- ☐ Yes
- ☐ No

29. If so, has the topic of nutrition and supplements in pregnancy been discussed during the course?

- ☐ Yes
- ☐ No

30. Did you use any food or vitamin supplements when you were pregnant?

- ☐ Yes
- ☐ No

31. If the answer is "yes", specify which ones

\_\_\_\_\_

32. Are you vegetarian?

- ☐ Yes
- ☐ No

33. Are you vegan?

☐ Yes

☐ No

34. Has your diet changed during pregnancy or was it your usual one?

☐ No

☐ Yes, I have decreased the amount of portions

☐ Yes, I have increased the portion size

☐ Yes, I have eliminated some foods

35. If you have reduced quantities, at what time of pregnancy?

☐ Never

☐ In the first trimester

☐ In the second trimester

☐ In the third trimester

36. If you have increased quantities, at what time of pregnancy?

☐ Never

☐ In the first trimester

☐ In the second trimester

☐ In the third trimester

37. Have you avoided some foods for pathologies or intolerances?

☐ No

☐ Yes

38. If the answer is "yes", specify the reason

---

39. If the answer is "yes", specify which foods

---

40. Have you introduced new products and food during pregnancy?

☐ No

☐ Yes

41. If the answer is "yes", specify which ones

---

---

---

---

---

42. If the answer is "yes", specify the trimester in which you have introduced new foods.

☐ No, I haven't introduced any new foods

☐ yes, from the 1°

☐ yes, from the 2°

☐ yes, from the 3°

43. Did you smoke during pregnancy?

☐ Yes

☐ No

44. Did you drink alcohol during pregnancy?

☐ Yes

☐ No



45. Did you take narcotic substances during pregnancy?

- ☐ Tranquilizer
- ☐ Cannabis
- ☐ Hashish
- ☐ Nothing
- ☐ Other: \_\_\_\_\_

Please indicate with an X the answer you most identify with (it can also indicate more than one answer).

46. How many times do you/did you practise pysical exercise?

|                      | Never                    | 1-2 times a week         | 3-4 times a week         | > 5 times a week         |
|----------------------|--------------------------|--------------------------|--------------------------|--------------------------|
| Before the pregnancy | <input type="checkbox"/> | <input type="checkbox"/> | <input type="checkbox"/> | <input type="checkbox"/> |
| During pregnancy     | <input type="checkbox"/> | <input type="checkbox"/> | <input type="checkbox"/> | <input type="checkbox"/> |

This part of the questionnaire contains a series of statements regarding the lifestyle or eating habits followed before pregnancy.

47. BEFORE PREGNANCY did you use olive oil as your main cooking fat?

☐ Yes

☐ No

48. BEFORE PREGNANCY Did you use 4 or more tablespoons of olive oil per day (including oil for frying, salad dressing, meals outside the home, etc.)?

☐ Yes

☐ No

49. BEFORE PREGNANCY Did you eat 2 or more servings of vegetables per day (1 serving = 200g)?

☐ Yes

☐ No

50. BEFORE PREGNANCY Did you consume 3 or more servings of fruit per day (including juices or natural centrifuges)?

☐ Yes

☐ No

51. BEFORE PREGNANCY Did you eat less than 1 serving (= 100-150g) of red meat, hamburgers or meat products (sausages etc) every day?

☐ Yes

☐ No

52. BEFORE PREGNANCY Did you consume less than 1 serving (12 g) of butter, margarine or cream per day?

☐ Yes

☐ No

53. BEFORE PREGNANCY Did you drink less than 1 glass (= 100ml) of carbonated sugary drinks per day?

☐ Yes

☐ No

54. BEFORE PREGNANCY Did you drink 7 or more glasses (= 100 ml) of red wine a week?

☐ Yes

☐ No

55. BEFORE PREGNANCY did you eat 3 or more portions (1 portion = 150g boiled) of legum a week?

☐ Yes

☐ No

56. BEFORE PREGNANCY did you eat 3 or more portions (1 portion = 150 g) of fish or sea fruit a week?

☐ Yes

☐ No

57. BEFORE PREGNANCY did you consume less than 3 times a week of sweets or commercial pastries (no homemade) as biscuits or cakes?

☐ Yes

☐ No

58. BEFORE PREGNANCY Did you consume 3 or more servings (1 serving = 30g) of dry fruit (walnuts, almonds, hazelnuts, etc.) a week?

☐ Yes

☐ No

59. BEFORE PREGNANCY Did you prefer white meat (chicken, turkey, rabbit) instead of red meat (veal, pork, hamburger, sausage)?

☐ Yes

☐ No

60. BEFORE PREGNANCY Did you use the “mixture” (tomato, onion, garlic or leek cooked with olive oil) to cook vegetables, pasta, rice or other dishes 2 or more times a week?

☐ Yes

☐ No

This part of the questionnaire contains a series of statements regarding the lifestyle, or eating habits, followed during the pregnancy period.

61. DURING PREGNANCY Did you use olive oil as your main cooking fat?

☐ Yes

☐ No

62. DURING PREGNANCY Did you use 4 or more tablespoons of olive oil per day (including oil for frying, salad dressing, meals outside the home, etc.)?

☐ Yes

☐ No

63. DURING PREGNANCY Did you eat 2 or more servings of vegetables per day (1 serving = 200g)?

☐ Yes

☐ No

64. DURING PREGNANCY Did you consume 3 or more servings of fruit per day (including natural juices)?

☐ Yes

☐ No

65. DURING PREGNANCY Did you consume less than 1 serving (= 100-150g) of red meat, hamburgers or meat products (sausages etc) every day?

☐ Yes

☐ No

66. DURING PREGNANCY Did you consume less than 1 serving (12 g) of butter, margarine or cream per day?

☐ Yes

☐ No

67. DURING PREGNANCY Did you drink less than 1 glass (= 100 ml) of sugary or carbonated drinks per day?

☐ Yes

☐ No

68. DURING PREGNANCY Did you drink 7 or more glasses (= 100 ml) of red wine a week?

☐ Yes

☐ No

69. DURING PREGNANCY did you consume 3 or more portions (1 portion = 150g boiled) of legumes a week?

☐ Yes

☐ No

70. DURING PREGNANCY Did you eat 3 or more portions (1 portion = 150 g) of fish or sea fruit a week?

☐ Yes

☐ No

71. DURING PREGNANCY did you consume less than 3 times a week sweets or commercial pastries (not homemade)?

☐ Yes

☐ No

72. DURING PREGNANCY Did you consume 3 or more servings (1 serving = 30g) of dry fruit (walnuts, almonds, hazelnuts, etc.) a week?

☐ Yes

☐ No

73. DURING PREGNANCY Did you prefer white meat (chicken, turkey, rabbit) or red meat (veal, pork, hamburger, sausage)?

☐ Yes

☐ No

74. DURING PREGNANCY Did you use the "mixture" (tomato, onion, garlic or leek cooked with olive oil) to cook vegetables, pasta, rice or other dishes 2 or more times a week?

☐ Yes

☐ No

Kindly, for each row (before pregnancy, first, second and third trimester) indicate with an X the answer with which you most identify.

75. How often have you eaten WHITE MEAT?

Select all applicable items.

|                  | Daily                    | Very Often               | 1-2 times a week         | Never                    |
|------------------|--------------------------|--------------------------|--------------------------|--------------------------|
| Before pregnancy | <input type="checkbox"/> | <input type="checkbox"/> | <input type="checkbox"/> | <input type="checkbox"/> |
| First            | <input type="checkbox"/> | <input type="checkbox"/> | <input type="checkbox"/> | <input type="checkbox"/> |
| Second           | <input type="checkbox"/> | <input type="checkbox"/> | <input type="checkbox"/> | <input type="checkbox"/> |
| Third            | <input type="checkbox"/> | <input type="checkbox"/> | <input type="checkbox"/> | <input type="checkbox"/> |

76. How often have you eaten RED MEAT?

Select all applicable items.

|                  | Daily                    | Very Often               | 1-2 times a week         | Never                    |
|------------------|--------------------------|--------------------------|--------------------------|--------------------------|
| Before pregnancy | <input type="checkbox"/> | <input type="checkbox"/> | <input type="checkbox"/> | <input type="checkbox"/> |
| First            | <input type="checkbox"/> | <input type="checkbox"/> | <input type="checkbox"/> | <input type="checkbox"/> |
| Second           | <input type="checkbox"/> | <input type="checkbox"/> | <input type="checkbox"/> | <input type="checkbox"/> |
| Third            | <input type="checkbox"/> | <input type="checkbox"/> | <input type="checkbox"/> | <input type="checkbox"/> |

77. How often have you eaten FISH?

Select all applicable items.

|                  | Daily                    | Very Often               | 1-2 times a week         | Never                    |
|------------------|--------------------------|--------------------------|--------------------------|--------------------------|
| Before pregnancy | <input type="checkbox"/> | <input type="checkbox"/> | <input type="checkbox"/> | <input type="checkbox"/> |
| First            | <input type="checkbox"/> | <input type="checkbox"/> | <input type="checkbox"/> | <input type="checkbox"/> |
| Second           | <input type="checkbox"/> | <input type="checkbox"/> | <input type="checkbox"/> | <input type="checkbox"/> |
| Third            | <input type="checkbox"/> | <input type="checkbox"/> | <input type="checkbox"/> | <input type="checkbox"/> |

78. How often have you eaten EGGS?

Select all applicable items.

|                  | Daily                    | Very Often               | 1-2 times a week         | Never                    |
|------------------|--------------------------|--------------------------|--------------------------|--------------------------|
| Before pregnancy | <input type="checkbox"/> | <input type="checkbox"/> | <input type="checkbox"/> | <input type="checkbox"/> |
| First            | <input type="checkbox"/> | <input type="checkbox"/> | <input type="checkbox"/> | <input type="checkbox"/> |
| Second           | <input type="checkbox"/> | <input type="checkbox"/> | <input type="checkbox"/> | <input type="checkbox"/> |
| Third            | <input type="checkbox"/> | <input type="checkbox"/> | <input type="checkbox"/> | <input type="checkbox"/> |

79. How often have you eaten LEGUMES?

Select all applicable items.

|                  | Daily                    | Very Often               | 1-2 times a week         | Never                    |
|------------------|--------------------------|--------------------------|--------------------------|--------------------------|
| Before pregnancy | <input type="checkbox"/> | <input type="checkbox"/> | <input type="checkbox"/> | <input type="checkbox"/> |
| First            | <input type="checkbox"/> | <input type="checkbox"/> | <input type="checkbox"/> | <input type="checkbox"/> |
| Second           | <input type="checkbox"/> | <input type="checkbox"/> | <input type="checkbox"/> | <input type="checkbox"/> |
| Third            | <input type="checkbox"/> | <input type="checkbox"/> | <input type="checkbox"/> | <input type="checkbox"/> |
